# Supplementary material for: Anti-Cancer Properties of Ginkgolic Acids in Human Nasopharyngeal Carcinoma CNE-2Z Cells via Inhibition of Heat Shock Protein 90
Source: MDPI journal article supplement (doi:10.3390/molecules26216575), 2021-10-30
Supplement: s1 [file s1]

*Article*

## **Anti-cancer properties of ginkgolic acids in human nasopharyngeal carcinoma CNE-2Z cells via inhibition of heat shock protein 90**

**Hong-Mei Li<sup>1,†</sup>, Hui Ma<sup>1,†</sup>, Xiaolong Sun<sup>1</sup>, Bohan Li<sup>1</sup>, Chengjiang Cao<sup>1</sup>, Yiqun Dai<sup>1</sup>, Meilin Zhu<sup>1</sup>, Cheng-Zhu Wu<sup>1,\*</sup>**

<sup>1</sup> School of Pharmacy, Bengbu Medical College, 2600 Donghai Road, Bengbu 233030, Anhui, China;

lihongmei@bbmc.edu.cn (H.-M.L.); mh9504@126.com (H.M.); sxl8172@126.com (X.S.); libohan1228@163.com (B.L.); b957667573@gmail.com (C.C.); daiyiqun25@126.com (Y.D.); zlyk521@126.com (M.Z.)

\* Correspondence: wuchengzhu0611@bbmc.edu.cn (C.-Z.W.) ;Tel.: +86-552-317-5232

<sup>†</sup> These authors contributed equally to this work.

|                  |                                                                                                                                          |   |
|------------------|------------------------------------------------------------------------------------------------------------------------------------------|---|
| <b>Figure S1</b> | Effects of GAS on expression level of MMP-2, MMP-9, and TIMP-1 in CNE-2Z cells by western blotting analysis .....                        | 3 |
| <b>Figure S2</b> | Effects of GAS on expression level of Bcl-2, Bax, Her-2, c-Raf, Akt, Hsp70, and Hsp90 in CNE-2Z cells by western blotting analysis_..... | 4 |

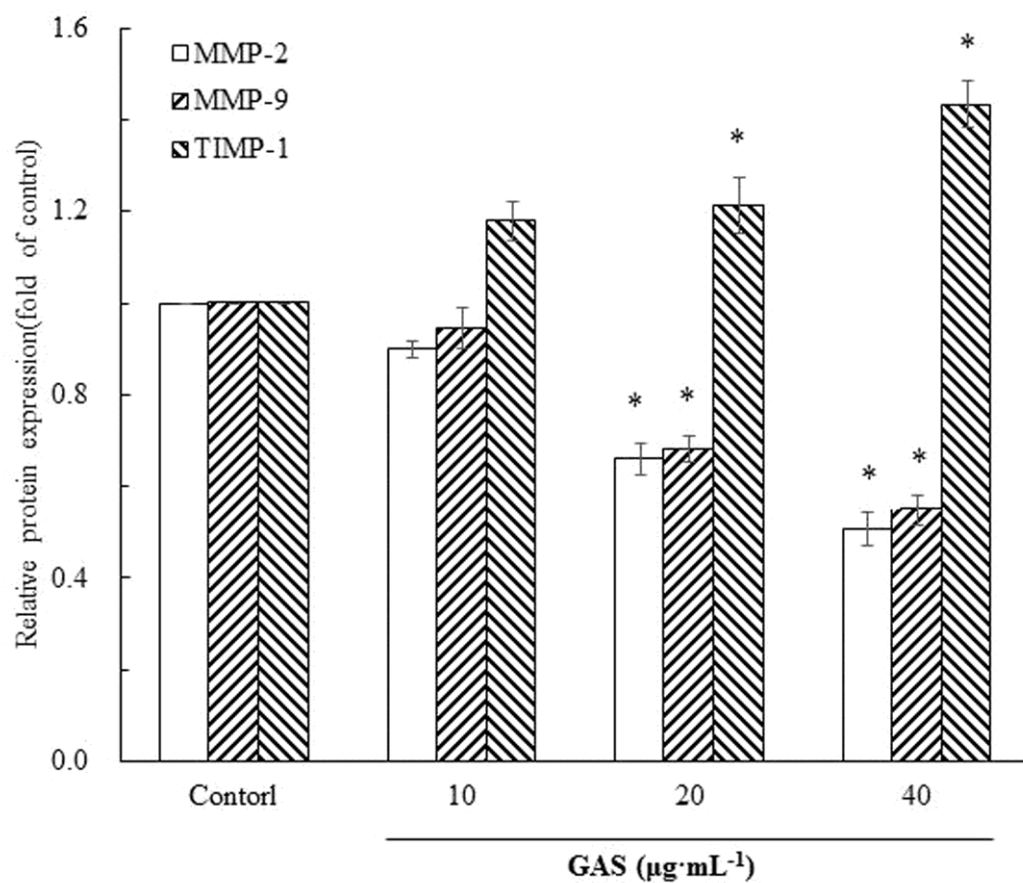

**Figure 1S.** Effects of GAS on expression level of MMP-2, MMP-9, and TIMP-1 in CNE-2Z cells by western blotting analysis. ( $\bar{x} \pm s$ ,  $n=3$ ), \* $p<0.05$  compared with control.

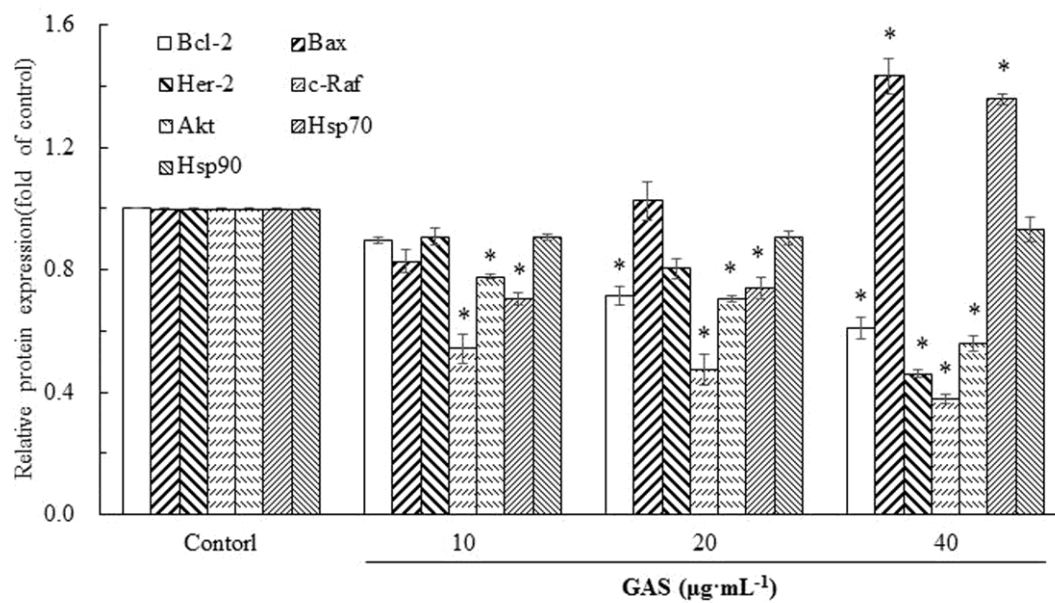

**Figure 2S.** Effects of GAS on expression level of Bcl-2, Bax, Her-2, c-Raf, Akt, Hsp70, and Hsp90 in CNE-2Z cells by western blotting analysis. ( $\bar{x} \pm s$ ,  $n=3$ ), \* $p<0.05$  compared with control.
